# Supplementary material for: Physician Cost Profiling
Source: Atypon-hosted journal article supplement (doi:10.1056/nejmc1004716), 2010-07-28
Supplement: nejmc1004716_appendix.pdf [file nejmc1004716_appendix.pdf]

## Supplementary Appendix

This appendix has been provided by the authors to give readers additional information about their work.

Supplement to: Luft HS and Eaton LJ. Physician cost profiling. *N Engl J Med* 2010;363:491-3.

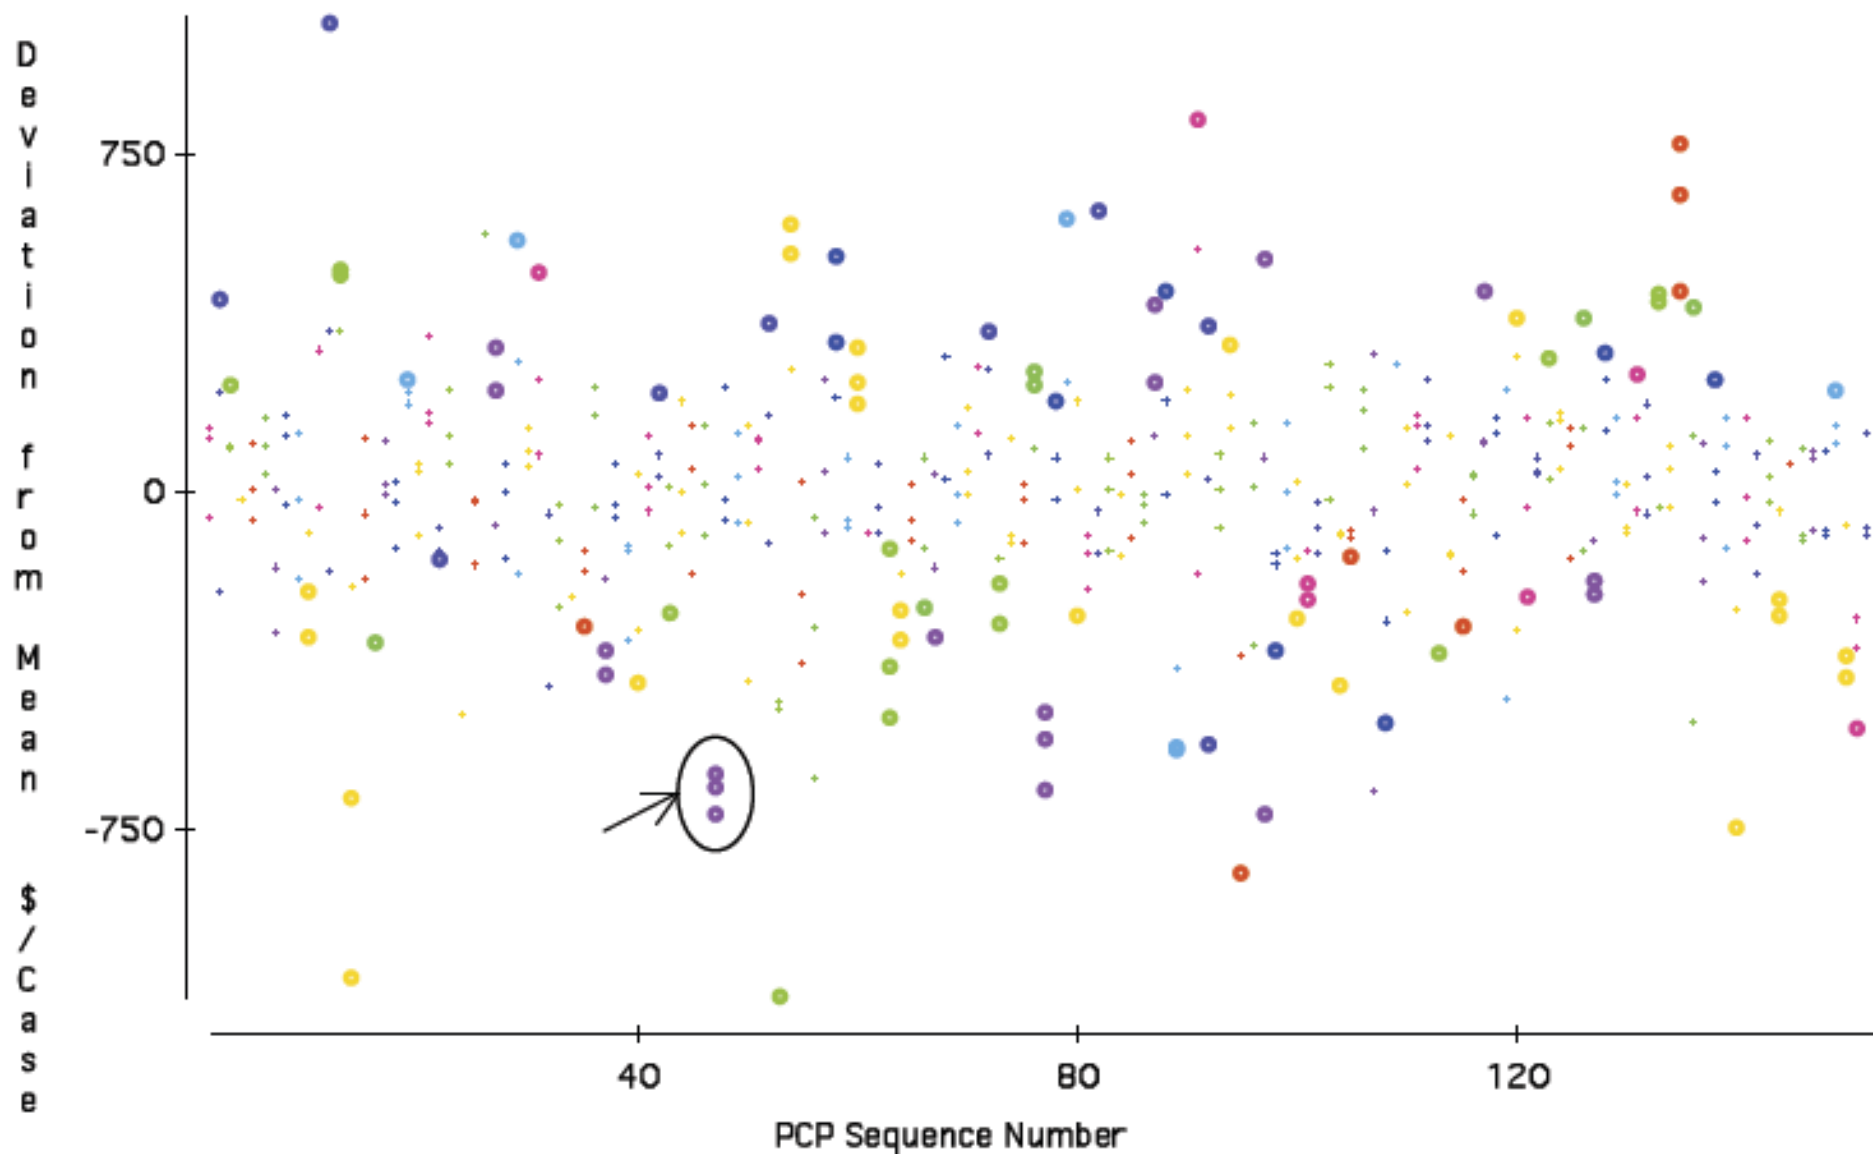

Each PCP can have up to 3 observations (2006, 7, and 8) that are vertically aligned; see circle. Colors are assigned arbitrarily to distinguish "adjacent" PCPs in the randomly ordered list. Values statistically significantly different from zero ( $p < .05$ ) are shown as larger points.
